# Supplementary material for: Isolation and Identification of Lactic Acid Bacteria from Cow Milk and Milk Products
Source: Hindawi journal article supplement (doi:10.1155/2021/4697445), 2021-08-10
Supplement: f1 [file 4697445.f1.pdf]

**Supplementary file:**

Procedure used to isolate, Identify and primary and secondary biochemical test used to identify the lactic acid bacteria

Table 1: Growth characteristics of lactic acid bacteria on selective Media and biochemical test

| Tests                          | <i>Lactobacilli</i> | <i>Lactococci</i>                     | <i>Streptococci</i>  | <i>Leuconostoc</i> | <i>Pediococcus</i>        | <i>Bifidobacteria</i>               |
|--------------------------------|---------------------|---------------------------------------|----------------------|--------------------|---------------------------|-------------------------------------|
| MRS                            | +                   | +                                     | +                    | +                  | +                         | +                                   |
| MRS+cysteine                   | +                   | +                                     | +                    | +                  | +                         | +                                   |
| M17                            | +                   | +                                     | +                    | +                  | +                         | +                                   |
| SL-Rogassa                     | +                   | +                                     | +                    | +                  | +                         | +                                   |
| Gram stain                     | +                   | +                                     | +                    | +                  | +                         | +                                   |
| properties                     | Rod<br>Chains       | Cocci<br>In pairs and<br>short chains | Cocci<br>Long chains | Cocci<br>Pairs     | Cocci<br>Pairs or tetrads | Rods<br>Pleomorphic,<br>filamentous |
| Catalase                       | -                   | -                                     | -                    | -                  | -                         | -                                   |
| Gas production from<br>glucose | -                   | -                                     | -                    | +                  | -                         | -                                   |
| Incub. 20                      | -                   | +                                     | -                    | +                  | +/-                       | -                                   |
| T° test (°C) 35                | +                   | +                                     | +                    | +                  | +                         | +                                   |
| 42                             | +                   | -                                     | +                    | -                  | +                         | -                                   |
| Glucose                        | +                   | +                                     | +                    | +                  | +                         | +                                   |
| Fructose                       | +                   | +                                     | +                    | +                  | +                         | +                                   |
| Maltose                        | +/-                 | +/-                                   | +/-                  | +/-                | +/-                       | +/-                                 |
| Mannitol                       | +/-                 | +/-                                   | +/-                  | +/-                | +/-                       | +/-                                 |
| Arabinose                      | +/-                 | +/-                                   | +/-                  | +/-                | +/-                       | +/-                                 |
| Raffinose                      | +/-                 | +/-                                   | +/-                  | +/-                | +/-                       | +/-                                 |
| Trehalose                      | +/-                 | +/-                                   | +/-                  | +/-                | +/-                       | +/-                                 |
| Sucrose                        | +/-                 | +/-                                   | +/-                  | +/-                | +/-                       | +/-                                 |
| Lactose                        | +/-                 | +/-                                   | +/-                  | +/-                | +/-                       | +/-                                 |
| Dulcitol                       | +/-                 | +/-                                   | +/-                  | +/-                | +/-                       | +/-                                 |

Table 2: Selective culture media and conditions for enumeration and isolation of lactic acid bacteria.

| LAB group                          | Media               | T (°C) | Duration (h) | Incubation Condition |
|------------------------------------|---------------------|--------|--------------|----------------------|
| <i>Lactobacilli</i>                | MRS                 | 30     | 48-72        | Aerobic              |
| <i>Lactococci and Streptococci</i> | M17                 | 37     | 48-72        | Aerobic              |
| <i>Lactobacillus</i>               | SL Rogassa          | 37     | 48-72        | Aerobic              |
| <i>Bifidobacteria</i>              | MRS+cysteine (0.5%) | 30     | 48-72        | Anaerobic            |

**Table 3:** Colony characteristics and bacterial count of isolated Lactobacillus from milk and milk product samples

| Type of sample<br>(Sample No.) | Media                                   | Colony characteristics                 |
|--------------------------------|-----------------------------------------|----------------------------------------|
| <b>Raw Milk (1)</b>            | MRS                                     | Yellow to white smooth creamy circular |
|                                | M17broth+agar powder                    | Pink to white circular                 |
|                                | Rogassa + acetic glacial acid (1.3ml/L) | Pinpoint spindle yellowish white       |
|                                | MRS+cysteine (0.5%)                     | Small creamy white circular            |
| <b>Raw milk (2)</b>            | MRS                                     | White pinpoint                         |
|                                | M17                                     | Small whitish yellow                   |
|                                | Rogassa                                 | Medium white small circular colony     |
| <b>Raw milk (3)</b>            | MRS+cysteine                            | Large flat colony                      |
|                                | MRS                                     | spindle pinpoint                       |
|                                | M17                                     | white shiny mucoid large               |
| <b>Raw milk (4)</b>            | Rogassa                                 | Small spindle white                    |
|                                | MRS+cysteine                            | Small circular white                   |
|                                | MRS                                     | White small pinpoint                   |
|                                | M17                                     | Large buttery                          |
| <b>Raw milk (5)</b>            | Rogassa                                 | Small to medium white                  |
|                                | MRS+cysteine (0.05%)                    | Small white creamy                     |
|                                | MRS                                     | Small white circular colony            |
|                                | M17                                     | Grayish white large circular           |
| <b>Raw milk (6)</b>            | Rogasa                                  | Small yellowish colony                 |
|                                | MRS+cysteine                            | White flat circular                    |
|                                | MRS                                     | a. white creamy large circular         |
|                                |                                         | b. small white pinpoint(spindle)       |
|                                | M17                                     | a. small yellowish pinpoint            |
|                                |                                         | b. large white circular                |
|                                | Rogasa                                  | a. small white creamy circular         |
|                                |                                         | b. yellowish spindle pinpoint          |
|                                | MRS+cysteine                            | a. small whitish circular              |
|                                |                                         | b. large creamy circular spindle       |
| c. yellowish mucoid            |                                         |                                        |
| MRS                            | a. yellowish white circular             |                                        |

|                     |              |                                                                               |
|---------------------|--------------|-------------------------------------------------------------------------------|
| <b>Raw milk (7)</b> |              | b. small spindle pinpoint                                                     |
|                     | M17          | a. large yellowish creamy white circular<br>b. small yellowish spindle        |
|                     | Rogasa       | a. Large white circular colony<br>b. small yellowish spindle                  |
|                     | MRS+cysteine | a. small creamy white circular<br>b. small tiny pinpoint                      |
| <b>Yoghurt (1)</b>  | MRS          | White small circular colony                                                   |
|                     | M17          | a. large white<br>b. medium to small white<br>c. small white                  |
|                     | Rogasa       | a. large creamy white<br>b. small white circular                              |
|                     | MRS+cysteine | a. large mucoid shiny<br>b. small white circular<br>c. irregular shape colony |
| <b>Yoghurt (2)</b>  | MRS          | a. white creamy circular<br>b. small pinpoint                                 |
|                     | M17          | small white pinpoint                                                          |
|                     |              | a. white creamy<br>b. small grayish white                                     |
|                     | MRS+cysteine | a. white large<br>b. small white                                              |
| <b>Yoghurt (3)</b>  | MRS          | a. small spindle pinpoint<br>b. small whitish grey                            |
|                     | M17          | small pin-point colony                                                        |
|                     | Rogasa       | a. white creamy circular<br>b. small whitish grey                             |
|                     | MRS+cysteine | a. large white circular colony<br>b. small pinpoint spindle                   |
| <b>Yoghurt (4)</b>  | MRS          | a. large white creamy circular<br>b. small whitish spindle                    |
|                     | M17          | a. white large circular<br>b. small pinpoint                                  |
|                     | Rogasa       | a. white creamy circular<br>b. yellowish white spindle                        |
|                     | MRS+cysteine | a. white creamy large circular<br>b. small yellowish spindle                  |

|                    |               |                                  |
|--------------------|---------------|----------------------------------|
| <b>Yoghurt (5)</b> | MRS           | a. whitish creamy circular       |
|                    |               | b. small pinpoint spindle        |
|                    | M17           | a.large yellow creamy circular   |
|                    |               | b.small whitish spindle          |
|                    | Rogasa        | a.large white circular           |
|                    |               | b.yellowish spindle              |
|                    | MRS+cysteine  | a.large yellowish creamy white   |
|                    |               | b.small white circular           |
| <b>Cheese (1)</b>  | MRS           | a.white small circular colony    |
|                    |               | b.spindle white grey             |
|                    |               | c.yeast like colony              |
|                    | M17           | a.white creamy small             |
|                    |               | b.small pinpoint                 |
|                    | Rogasa        | a.medium white colony            |
|                    |               | b.small pinpoint                 |
|                    | MRS+ cysteine | a.large white flat circular      |
|                    |               | b.small white                    |
| <b>Cheese (2)</b>  | MRS           | a.large white circular           |
|                    |               | b.small white circular           |
|                    | M17           | a.white cottony circular         |
|                    |               | b.small white colony             |
|                    | Rogasa        | white circular                   |
|                    | MRS+ cysteine | a.white large circular           |
|                    |               | b.small white                    |
|                    |               | a.white large shiny round        |
| <b>Cheese(3)</b>   | MRS           | b.small white round              |
|                    | M17           | a.white large mucoïd shiny round |
|                    |               | b.yellow fine spindle            |
|                    | Rogasa        | a.large white round              |
|                    |               | b.small white spindle            |
|                    | MRS+cysteine  | a.small white milky              |
|                    |               | b.large white spindle            |
| <b>Cheese (4)</b>  | MRS           | a. large white round             |
|                    |               | b. small white spindle           |
|                    | M17           | pinpoint grey spindle            |
|                    | Rogasa        | small yellow round               |
|                    | MRS+cysteine  | a. small grey Spindle            |

**Table-4:** Carbohydrates fermentation of lactic acid bacteria isolated from raw cowmilk, yoghurt and cheese in MRS media.

| Sample. No. | Gram reaction | Catalase test | Glucose | Fructose | Maltose | Arabinose | Mannitol | Trehalose | Raffinose | Sucrose | Lactose | Dulcitol | BCP | Bacterial Morphology  | Isolated presumptive genus |
|-------------|---------------|---------------|---------|----------|---------|-----------|----------|-----------|-----------|---------|---------|----------|-----|-----------------------|----------------------------|
| 1           | +             | -             | +       | +        | +       | +         | +        | -         | -         | -       | +       | -        | +   | Rod                   | Lactobacilli               |
| 2           | +             | -             | -       | -        | -       | -         | +        | -         | -         | +       | +       | -        | -   | Rod                   | Lactobacilli               |
| 3           | +             | -             | +       | +        | +       | +         | +        | v         | -         | -       | +       | +        | -   | Rod                   | Lactobacilli               |
| 4           | +             | -             | -       | +        | -       | -         | -        | -         | -         | -       | +       | -        | -   | Cocci to coccobacilli | Leuconostoc                |
| 5           | +             | -             | +       | +        | +       | +         | +        | -         | -         | -       | V       | -        | -   | Cocci in chains       | Pediococcus                |
| 6           | +             | -             | +       | +        | V       | +         | +        | +         | -         | -       | -       | -        | +   | Rod                   | Lactobacilli               |
| 7           | +             | -             | +       | +        | -       | +         | +        | +         | -         | -       | +       | -        | -   | Rod                   | Lactobacilli               |
| 8           | +             | -             | +       | +        | +       | +         | +        | +         | -         | +       | -       | -        | -   | Rod                   | Lactobacilli               |
| 9           | +             | -             | +       | +        | -       | -         | +        | +         | -         | +       | -       | -        | +   | Cocci in pairs        | Lactococcus                |
| 10          | +             | -             | +       | +        | -       | -         | +        | +         | -         | +       | -       | -        | -   | Cocci                 | Lactococcus                |
| 11          | +             | -             | +       | +        | +       | +         | +        | v         | +         | -       | +       | -        | +   | Rod                   | Lactobacilli               |
| 12          | +             | -             | +       | +        | V       | +         | -        | +         | -         | +       | -       | -        | +   | Cocci                 | Lactococcus                |
| 13          | +             | -             | +       | +        | +       | +         | +        | +         | v         | +       | +       | -        | -   | Cocci                 | Pediococcus                |
| 14          | +             | -             | +       | +        | +       | -         | -        | +         | -         | +       | +       | -        | +   | Rod                   | Lactobacilli               |
| 15          | +             | -             | +       | +        | +       | -         | -        | +         | -         | +       | +       | -        | +   | Rod                   | Lactobacilli               |
| 16          | +             | -             | +       | -        | -       | -         | -        | -         | -         | +       | +       | -        | -   | Rod                   | Lactobacilli               |

BCP= Bromocresol purple dye, V=Variable, (+) = positive, (-) = negative

1,2,3,4,7,11,13 = milk sample, 5,8,9,12,14 = yoghurt, 6,10,15,16 = cheese

**Table-5:** Carbohydrates fermentation of lactic acid bacteria isolated from raw cow milk, yoghurt and cheese in M17 broth + agar powder

| Sample No. | Gram reaction | Catalase test | Glucose | Fructose | Maltose | Arabinose | Mannitol | Trehalose | Raffinose | Sucrose | Lactose | Dulcitol | BCP | Bacterial Morphology | Isolated presumptive genus |
|------------|---------------|---------------|---------|----------|---------|-----------|----------|-----------|-----------|---------|---------|----------|-----|----------------------|----------------------------|
| 1          | +             | -             | +       | +        | +       | +         | +        | -         | -         | +       | +       | -        | -   | Cocci                | Lactococcus                |
| 2          | +             | -             | -       | +        | +       | -         | -        | +         | +         | -       | +       | -        | +   | Rod                  | Lactobacilli               |
| 3          | +             | -             | +       | -        | -       | +         | v        | +         | -         | -       | -       | -        | -   | Cocci                | Lactococcus                |
| 4          | +             | -             | -       | +        | +       | +         | +        | -         | -         | -       | +       | -        | -   | Rod                  | Lactobacilli               |
| 5          | +             | -             | +       | V        | +       | +         | +        | -         | -         | -       | +       | -        | -   | Cocci                | Lactococcus                |
| 6          | +             | -             | +       | +        | -       | v         | -        | +         | +         | +       | +       | -        | +   | Rod                  | Lactobacilli               |
| 7          | +             | -             | +       | -        | +       | -         | -        | v         | +         | +       | -       | -        | +   | Rod                  | Lactobacilli               |
| 8          | +             | -             | +       | +        | +       | +         | +        | +         | -         | -       | +       | -        | -   | Cocci                | Lactococcus                |
| 9          | +             | -             | -       | +        | -       | +         | -        | -         | -         | -       | -       | -        | -   | Cocci                | Lactococcus                |
| 10         | +             | -             | +       | V        | +       | -         | +        | -         | -         | -       | +       | -        | -   | Cocci                | Lactococcus                |
| 11         | +             | -             | +       | -        | -       | +         | -        | +         | +         | +       | +       | -        | +   | Rod                  | Lactobacilli               |
| 12         | +             | -             | -       | +        | -       | +         | -        | -         | -         | -       | +       | -        | +   | Rod                  | Lactobacilli               |
| 13         | +             | -             | +       | V        | +       | +         | +        | -         | v         | +       | +       | -        | -   | Cocci                | Lactococcus                |
| 14         | +             | -             | +       | +        | +       | +         | v        | +         | -         | -       | +       | -        | -   | Rod                  | Lactobacilli               |
| 15         | +             | -             | +       | -        | +       | -         | +        | -         | -         | -       | -       | -        | +   | Cocci                | Lactococcus                |
| 16         | +             | -             | +       | +        | V       | -         | -        | -         | -         | +       | +       | -        | +   | Cocci                | Lactococcus                |

BCP= Bromocresol purple dye, V=Variable, (+) = positive, (-) = negative,

1,2,3,4,7,11,13 = milk sample, 5,8,9,12,14 = yoghurt, 6,10,15,16 = cheese

**Table-6:** Carbohydrates fermentation of lactic acid bacteria isolated from raw cow milk, yoghurt and cheese in Rogassa agar medium.

| Sample. No. | Gram reaction | Catalase test | Glucose | Fructose | Maltose | Arabinose | Mannitol | Trehalose | Raffinose | Sucrose | Lactose | Dulcitol | BCP | Bacterial Morphology | Isolated presumptive genus |
|-------------|---------------|---------------|---------|----------|---------|-----------|----------|-----------|-----------|---------|---------|----------|-----|----------------------|----------------------------|
| 1           | +             | -             | +       | +        | -       | -         | -        | -         | V         | +       | +       | -        | +   | Rod                  | Lactobacilli               |
| 2           | +             | -             | +       | -        | +       | -         | -        | +         | -         | -       | +       | +        | +   | Cocci                | Lactococcus                |
| 3           | +             | -             | +       | +        | +       | -         | -        | +         | -         | +       | -       | -        | -   | Cocci                | Lactococcus                |
| 4           | +             | -             | +       | -        | -       | -         | +        | -         | +         | +       | -       | +        | -   | Rod                  | Lactobacilli               |
| 5           | +             | -             | +       | +        | -       | +         | -        | -         | -         | -       | -       | -        | -   | Rod                  | Lactobacilli               |
| 6           | +             | -             | +       | -        | +       | -         | +        | -         | -         | +       | +       | -        | +   | Rod                  | Lactobacilli               |
| 7           | +             | -             | -       | V        | -       | -         | -        | -         | -         | -       | -       | -        | -   | Cocci                | Lactococcus                |
| 8           | +             | -             | +       | +        | +       | +         | +        | v         | +         | +       | +       | -        | +   | Rod                  | Lactobacilli               |
| 9           | +             | -             | -       | +        | -       | -         | +        | -         | -         | -       | -       | -        | -   | Rod                  | Lactobacilli               |
| 10          | +             | -             | +       | -        | +       | -         | -        | -         | -         | -       | +       | -        | -   | Rod                  | Lactobacilli               |
| 11          | +             | -             | +       | +        | -       | +         | -        | -         | -         | +       | +       | -        | +   | Rod                  | Lactobacilli               |
| 12          | +             | -             | -       | -        | +       | +         | v        | +         | +         | +       | -       | -        | +   | Cocci                | Lactococcus                |
| 13          | +             | -             | +       | +        | -       | -         | +        | +         | +         | -       | +       | -        | -   | Rod                  | Lactobacilli               |
| 14          | +             | -             | V       | -        | -       | -         | -        | v         | +         | +       | +       | -        | -   | Cocci                | Lactococcus                |
| 15          | +             | -             | +       | +        | +       | +         | -        | +         | -         | +       | +       | -        | +   | Cocci                | Lactococcus                |
| 16          | +             | -             | -       | -        | -       | -         | +        | +         | +         | +       | -       | -        | -   | Rod                  | Lactobacilli               |

BCP= Bromocresol purple dye, V=Variable, (+) = positive, (-) = negative,

1,2,3,4,7,11,13 = milk sample, 5,8,9,12,14 = yoghurt, 6,10,15,16 = cheese

**Table-7:** Carbohydrates fermentation of lactic acid bacteria isolated from raw cow milk, yoghurt and cheese in MRS+cysteine (0.5%)

| Sample No. | Gram reaction | Catalase test | Glucose | Fructose | Maltose | Arabinose | Mannitol | Trehalose | Raffinose | Sucrose | Lactose | Dulcitol | BCP | Bacterial Morphology | Isolated presumptive genus |
|------------|---------------|---------------|---------|----------|---------|-----------|----------|-----------|-----------|---------|---------|----------|-----|----------------------|----------------------------|
| 1          | +             | -             | +       | +        | -       | -         | +        | +         | +         | +       | -       | -        | +   | Filamentous rod      | Lactobacilli               |
| 2          | +             | -             | +       | +        | +       | -         | -        | +         | V         | -       | -       | -        | +   | Pleomorphic Rod      | Bifidobacteria             |
| 3          | +             | -             | -       | -        | +       | +         | +        | V         | -         | +       | -       | -        | -   | Rod                  | Lactobacilli               |
| 4          | +             | -             | v       | +        | -       | +         | -        | -         | -         | -       | -       | -        | -   | Rod                  | Lactobacilli               |
| 5          | +             | -             | +       | +        | -       | +         | +        | -         | -         | -       | +       | -        | +   | Rod                  | Bifidobacteria             |
| 6          | +             | -             | +       | +        | +       | +         | -        | +         | -         | +       | +       | -        | -   | Rod                  | Lactobacilli               |
| 7          | +             | -             | +       | -        | +       | v         | -        | -         | +         | +       | v       | -        | +   | Rod                  | Lactobacilli               |
| 8          | +             | -             | -       | -        | +       | -         | -        | -         | -         | +       | -       | -        | -   | Rod                  | Lactobacilli               |
| 9          | +             | -             | +       | V        | +       | -         | -        | +         | -         | -       | +       | -        | +   | Filamentous rod      | Lactobacilli               |
| 10         | +             | -             | +       | +        | +       | -         | -        | +         | -         | v       | +       | -        | +   | Pleomorphic rod      | Bifidobacteria             |
| 11         | +             | -             | +       | +        | +       | +         | -        | -         | -         | -       | +       | -        | -   | Pleomorphic rod      | Bifidobacteria             |
| 12         | +             | -             | +       |          | V       | +         | -        | +         | -         | +       | +       | -        | -   | Rod                  | Lactobacilli               |
| 13         | +             | -             | +       | +        | +       | +         | +        | -         | +         | +       | +       | -        | +   | Pleomorphic rod      | Bifidobacteria             |
| 14         | +             | -             | +       | +        | +       | +         | -        | +         | -         | +       | +       | +        | +   | Rod                  | Lactobacilli               |
| 15         | +             | -             | +       | +        | V       | +         | +        | -         | -         | -       | +       | -        | +   | Cocci                | Lactococcus                |
| 16         | +             | -             | +       | -        | -       | -         | V        | +         | -         | +       | +       | -        | -   | Cocci                | Lactococcus                |

BCP= Bromocresol purple dye, V=Variable, (+) = positive, (-) = negative

1,2,3,4,7,11,13 = milk sample, 5,8,9,12,14 = yoghurt, 6,10,15,16 = cheese
